# Supplementary material for: Qualitative study of the views of people living with cardiovascular disease, and healthcare professionals, towards the use of a digital platform to support cardiovascular disease self-management
Source: HighWire-hosted journal article supplement (doi:10.1136/bmjopen-2021-056768), 2022-11-01

Multimedia Appendix 1. Proposed structure of digital health platform for health behaviour change and self-management of CVD.

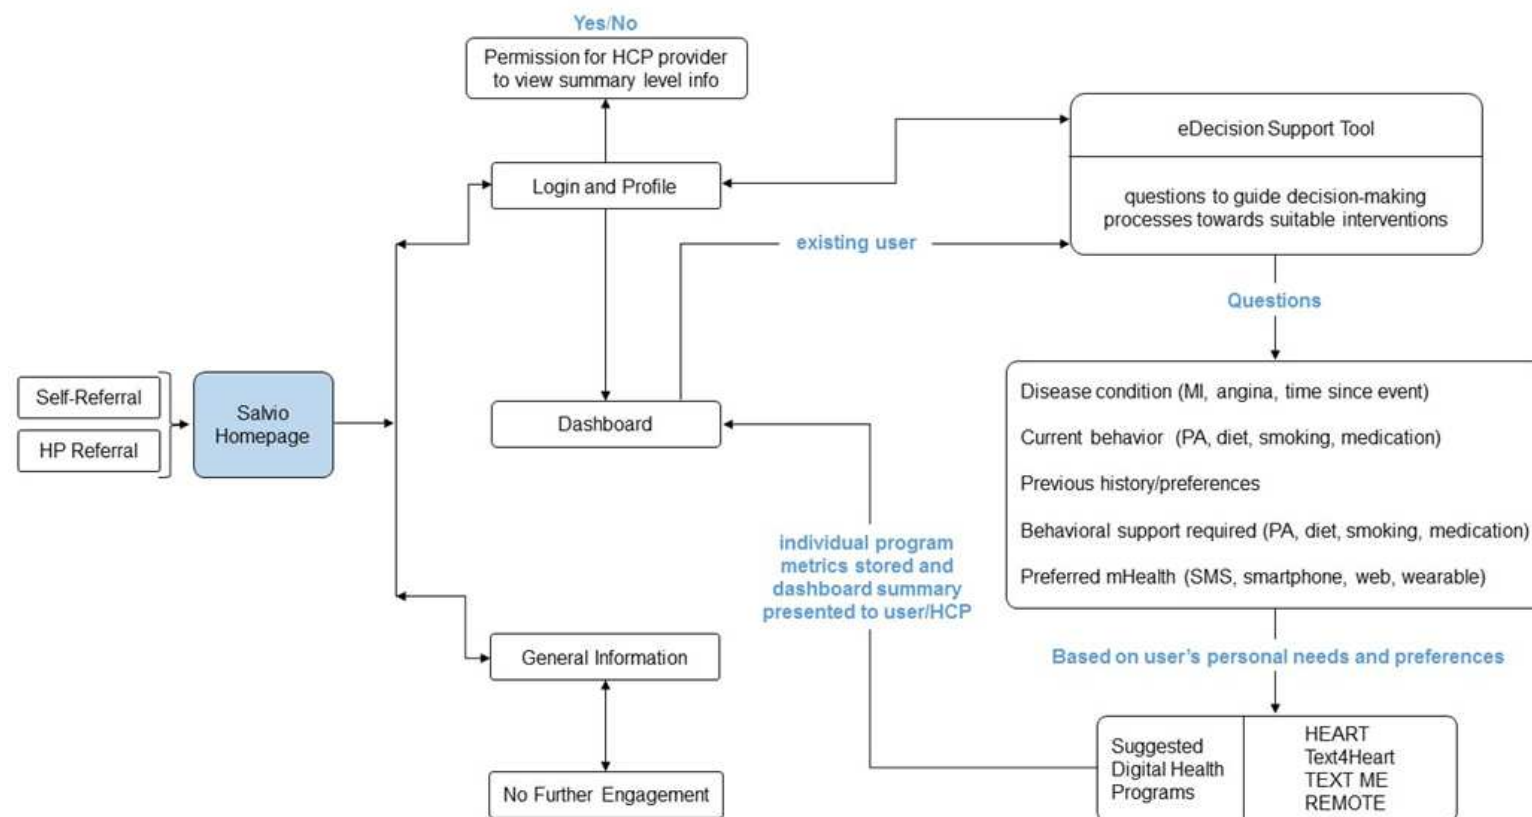

Supplement: bmjopen-2021-056768supp001_data_supplement.pdf [file bmjopen-2021-056768supp001_data_supplement.pdf]
